# Supplementary material for: Comparison of Mouse and Human Retinal Pigment Epithelium Gene Expression Profiles: Potential Implications for Age-Related Macular Degeneration
Source: PLoS One. 2015 Oct 30;10(10):e0141597. doi: 10.1371/journal.pone.0141597 (PMC4627757; doi:10.1371/journal.pone.0141597)
Supplement: S7 Table — (XLS) [file pone.0141597.s018.xls]

## Sheet: Sheet0
© 2000-2015 QIAGEN. All rights reserved.
ID	Molecules in Network	Score	Focus Molecules	Top Diseases and Functions
1	Actin,AHCYL1,Akt,AKT2,Alp,Alpha catenin,caspase,CCT8,Collagen type I,F Actin,HDGF,HIPK3,HNRNPU,Hsp27,Hsp70,LGALS3BP,MAEA,MDM2,NADPH oxidase,PI3K (family),PP2A,PRDX2,RELA,RNA polymerase II,Rock,SLC39A4,SNRNP70,SORBS1,Sos,SRSF1,STARD13,TJP1,TOM1L2,Ubiquitin,ZBTB20	37	19	Infectious Disease, Cancer, Reproductive System Disease
2	60S ribosomal subunit,ADCY,AHNAK,Ap1,BNIP3L,CAMK2G,COL3A1,Collagen type IV,Collagen(s),DCC,ERK1/2,Fgf,FGF23,FGFR1,FSH,GNAS,IL1,Lh,MGAT3,PAICS,Pdgf (complex),PDGF BB,PEPCK,Pkg,PLC gamma,Proinsulin,PTGES,RAB5A,Rar,RPL10,RPL23,RPL18A,STAT5a/b,TIMP2,UGP2	33	17	Connective Tissue Disorders, Developmental Disorder, Skeletal and Muscular Disorders
3	ATP11A,CHCHD1,CLPTM1L,DHX40,EMB,FRYL,GOLGA7,GPAA1,LMBRD1,MICALL1,MRPL42,MRS2,MVB12A,MVB12B,OLFM1,OTUD7A,PAX7,PIGK,PIGS,PIGT,PPA2,PTGR1,RNF220,SLC44A1,TMED4,TMEM259,TMEM30A,TSHZ3,UBC,UBFD1,VPS37A,ZCCHC6,ZDHHC9,ZFAND3,ZNF407	28	16	Connective Tissue Disorders, Developmental Disorder, Hereditary Disorder
4	ACP1,AMPK,ANKRD44,COX14,FAM107B,Focal adhesion kinase,Gsk3,HADHB,hemoglobin,Histone h3,HNF4A,IgG,IL12 (family),Insulin,Interferon alpha,Jnk,LUC7L2,Mapk,MDH1,MKP2/5,MTORC1,NUDT6,p85 (pik3r),PI3K (complex),Pka,Pkc(s),PLC,RHOA,SEC11C,SEPP1,SPCS2,TACC2,TCF19,TPH1,Vegf	25	15	Cell Morphology, Cellular Assembly and Organization, Cellular Function and Maintenance
5	ANXA7,ATXN2,C2CD2,C4orf32,CNOT1,CNPY2,COPA,CSTB,DESI2,DYNLRB1,ECH1,ELAVL1,EVL,FOPNL,GDPGP1,GOSR2,KIAA2013,LDLRAD3,LINS,LRRC37B,MARVELD2,MB21D1,OR6T1,RBM47,RNF212,SLC18B1,SLC41A1,SRC,TMEM108,TMEM38B,UBC,VSIG10,ZNF148,ZNF529,ZSWIM1	24	15	Hereditary Disorder, Neurological Disease, Developmental Disorder
6	26s Proteasome,ALDH3A1,Calcineurin protein(s),calpain,CAMK2N1,CD3,Ck2,Clathrin,Creb,CREB5,Cyclin A,DAD1,ERK,estrogen receptor,FBN1,Fibrinogen,HCCS,HECTD1,HLA-DQB1,Hsp90,Immunoglobulin,LDL,Mek,Nfat (family),NFkB (complex),P38 MAPK,PICALM,PPP3CA,Ras,SOD2,STIM1,Tgf beta,UBE2R2,VCP,voltage-gated calcium channel	23	14	Drug Metabolism, Molecular Transport, Small Molecule Biochemistry
7	ABI3BP,BCL2,Bcl9-Cbp/p300-Ctnnb1-Lef/Tcf,BNIPL,CD44,CNTNAP2,COL14A1,CRYBB2,CRYGB,CRYGC,CRYGD,CYSLTR1,DHX37,FAM129A,FOXP3,HEATR1,HELZ,LENEP,MAF,MAP7D1,MBNL1,MGAT1,MIF,mir-302,miR-451a (and other miRNAs w/seed AACCGUU),MOGAT1,MYC,NCAPG2,NOSIP,SPNS1,TRMT1L,UTP15,ZMIZ2,ZNF408,ZNF771	15	9	Ophthalmic Disease, Developmental Disorder, Cancer
